# Supplementary material for: Carbonaceous layer interfaced TiO2/RGO hybrids with enhanced visible-light photocatalytic performance
Source: Royal Society of Chemistry journal article supplement (doi:10.1039/c6ra02431a), 2016-01-01
Supplement: c6ra02431a1.pdf [file c6ra02431a1.pdf]

## Supplementary Information

### Carbonaceous layer interfaced TiO<sub>2</sub>/RGO hybrids with enhanced visible-light photocatalytic performance

Jianfeng Xu, Jiawei Tian, Yuewei Zhang, Ammara Riaz, Yi Liu, Mingjia Zhi, Zhanglian Hong, Chunmei Zhou\*

State Key laboratory of Silicon Materials, School of Materials Science and Engineering, Zhejiang University, Hangzhou 310027, China

\*Email: [cmzhou@zju.edu.cn](mailto:cmzhou@zju.edu.cn)

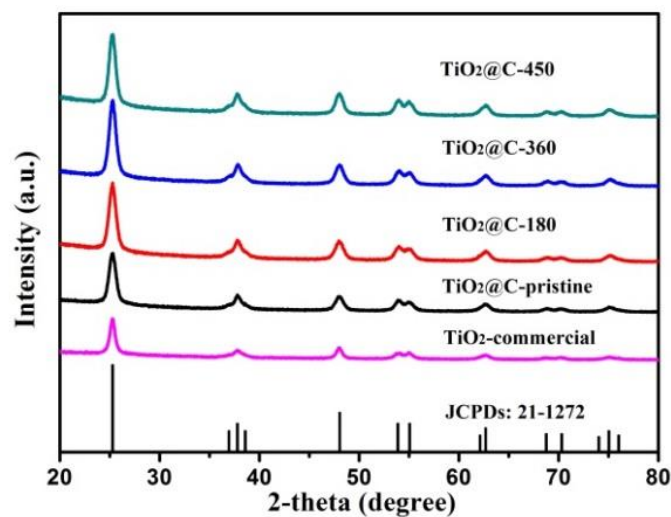

Fig. S1 XRD patterns of TiO<sub>2</sub>@C samples.

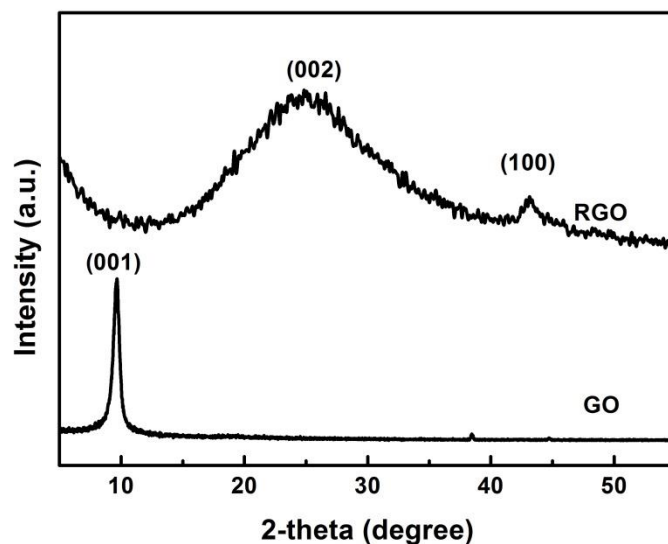

**Fig. S2** XRD patterns of graphene oxide and reduced graphene oxide after solvothermal process at 120 °C for 3 hours.

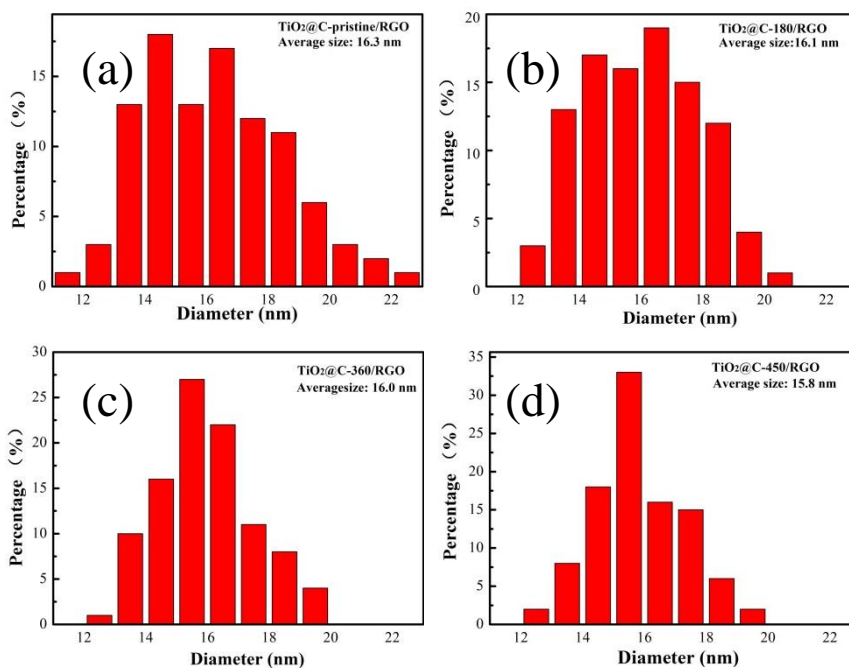

**Fig. S3** The average size of the TiO<sub>2</sub>@C/RGO samples calculated by Nano Measurer software: TiO<sub>2</sub>@C-pristine/RGO (a), TiO<sub>2</sub>@C-180/RGO (b), TiO<sub>2</sub>@C-360/RGO (c), and TiO<sub>2</sub>@C-450/RGO (d).

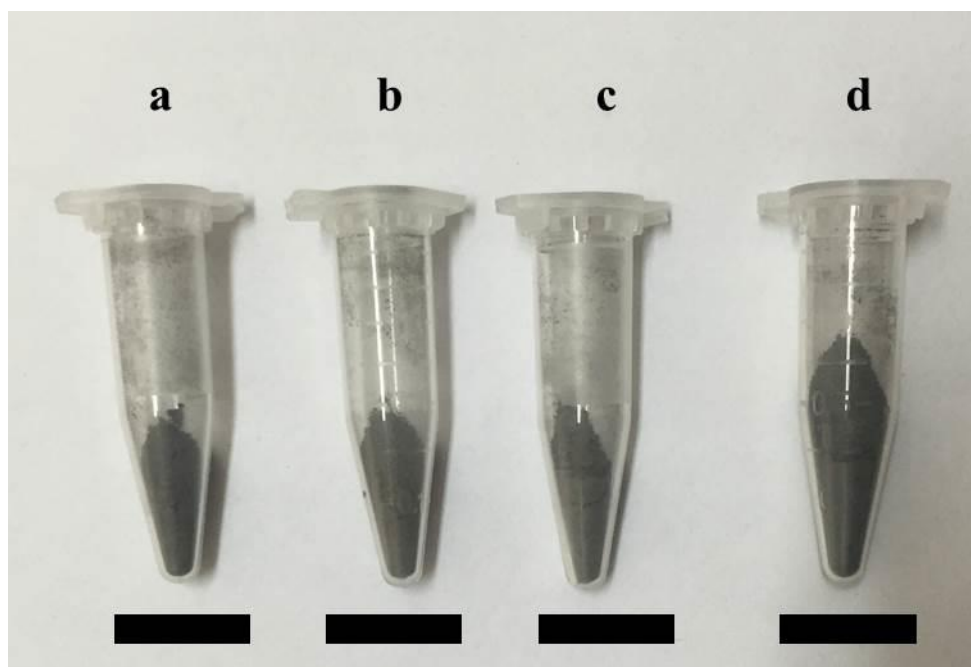

**Fig. S4** The photography of the  $\text{TiO}_2@C/\text{RGO}$  samples:  $\text{TiO}_2@C$ -pristine/RGO (a),  $\text{TiO}_2@C$ -180/RGO (b),  $\text{TiO}_2@C$ -360/RGO (c), and  $\text{TiO}_2@C$ -450/RGO (d).

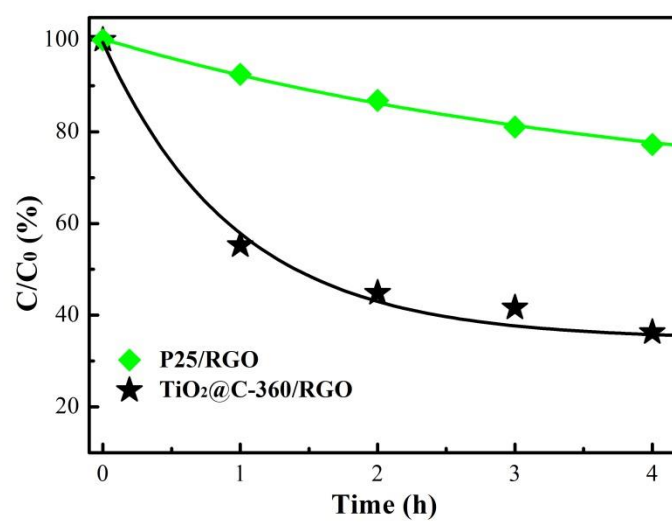

**Fig. S5** Photocatalytic degradation curves of MO within the presence of P25/RGO and  $\text{TiO}_2@C$ -360/RGO.
